# Supplementary material for: CD47 blockade reduces the pathologic features of experimental cerebral malaria and promotes survival of hosts with Plasmodium infection
Source: PubMed Central journal article supplement — Proc Natl Acad Sci U S A. 2021 Mar 8;118(11):e1907653118. doi: 10.1073/pnas.1907653118 (PMC7980459; doi:10.1073/pnas.1907653118), 2021-03-08
Supplement: pnas.1907653118.sapp.pdf [file pnas.1907653118.sapp.pdf]

# PNAS

www.pnas.org

Supplementary Information for

CD47 blockade reduces the pathologic features of experimental cerebral malaria and promotes survival of hosts with *Plasmodium* infection

Laughing Bear Torrez Dulgeroff<sup>a</sup>, Miranda S. Oakley<sup>b</sup>, Michal C. Tal<sup>a</sup>; Ying Ying Yiu<sup>a</sup>, Joy Q. He<sup>a</sup>, Maia Shoham<sup>a</sup>, Victoria Majam<sup>b</sup>, Winter A. Okoth<sup>b</sup>, Pallavi Malla<sup>b</sup>, Sanjai Kumar<sup>b</sup>, and Irving L. Weissman<sup>a,1</sup>.

Laughing Bear Torrez Dulgeroff & Irv Weissman  
Email: [laughingbeartorrez@gmail.com](mailto:laughingbeartorrez@gmail.com) & [irv@stanford.edu](mailto:irv@stanford.edu)

**This PDF file includes:**

Figures S1 to S5

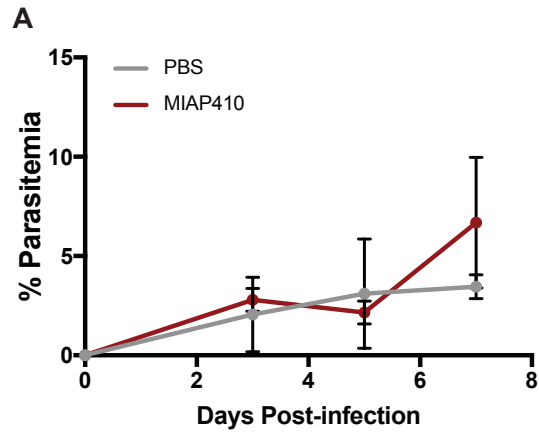

**Fig. S1. Parasitemia during cerebral phase of *Pb-A* infection.** (A) Percent parasitemia during the cerebral phase of *Pb-A* infection in C57BL/6 mice treated with PBS or anti-CD47 (MIAP410) plotted as mean  $\pm$  SEM. There was no significant difference in percent parasitemia between PBS and anti-CD47 (MIAP410) treated mice.

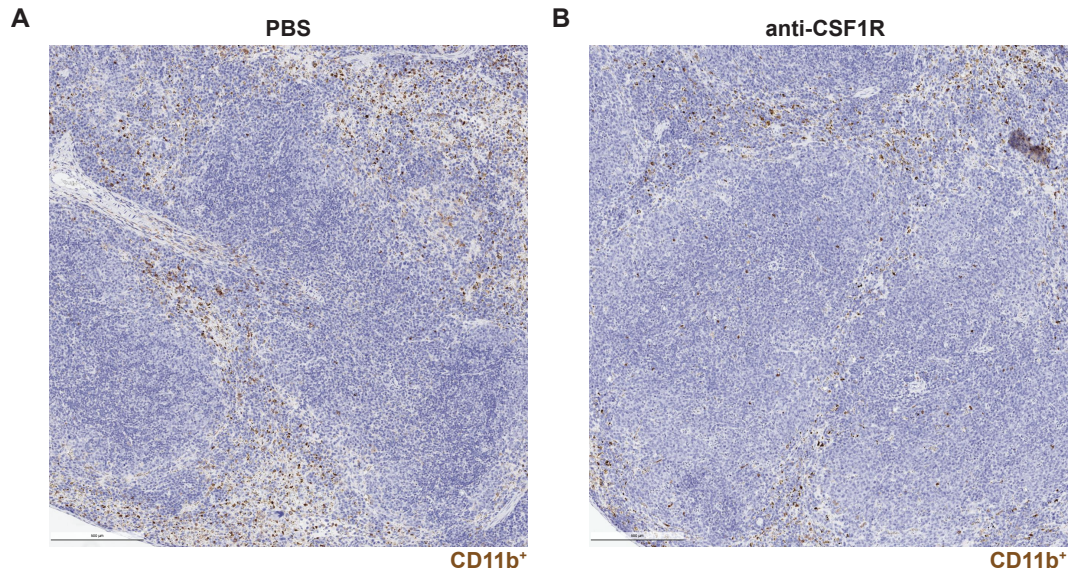

**Fig. S2. Long-term anti-CSF1R treatment results in depletion of CD11b<sup>+</sup> splenic macrophages.** (A) Mice were treated for three weeks with anti-CSF1R resulting in depletion of macrophages compared to (B) untreated mice. Scale is 500  $\mu$ m.

A

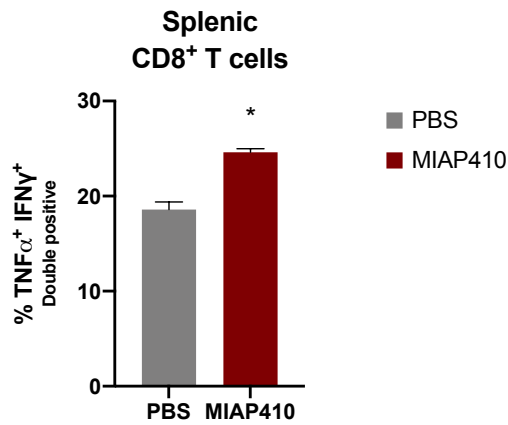

**Fig. S3. CD8<sup>+</sup> T cells contribute to increased circulating cytokine levels in CD47 blockade treated mice.** Flow cytometry analysis of spleens harvested on day 6 post-infection from mice infected with *Pb-A* treated with anti-CD47 (MIAP410) or PBS, plotted as mean  $\pm$  SEM. MIAP410 treated mice had an increase in TNF $\alpha$  IFN $\gamma$  double positive splenic CD8<sup>+</sup> T cells compared to PBS-treated mice. (n = 5) (\*p<0.05)

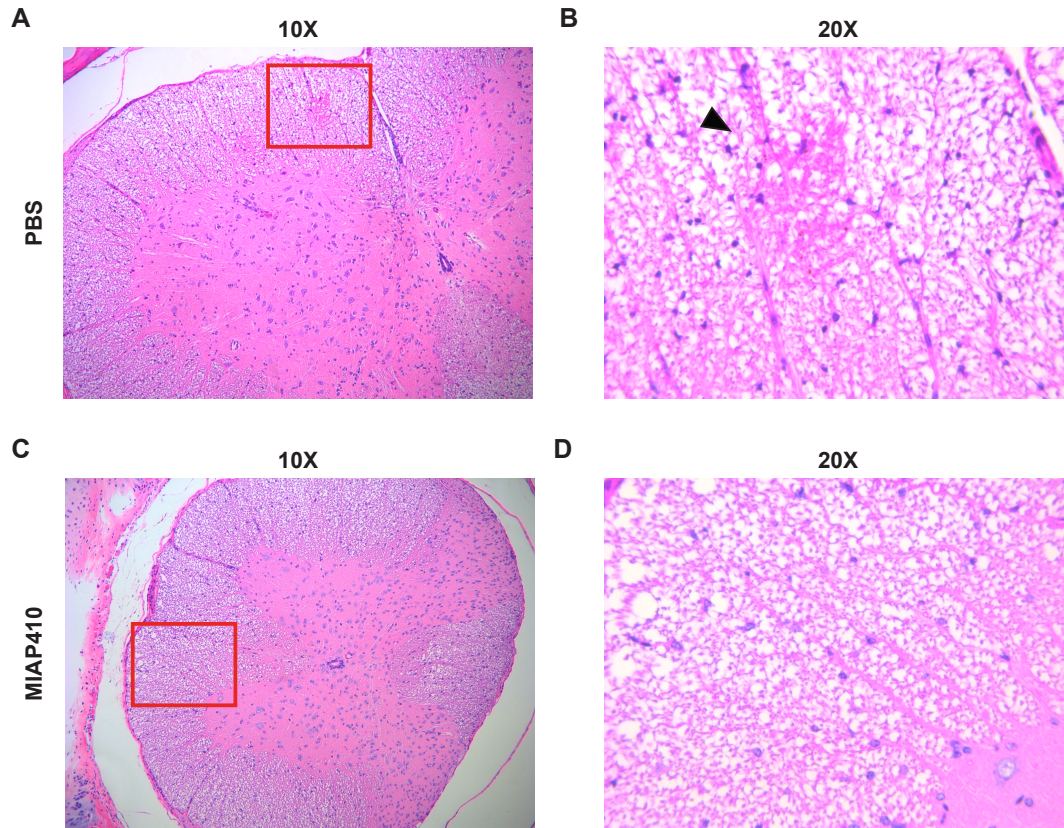

**Fig. S4. CD47 blockade reduces pathologic features of experimental cerebral malaria in the spinal cord.** C57BL/6 mice on day 6 post-infection (A) H&E staining of spinal cord tissue of PBS treated mice taken at 10X and (B) 20X, and (C) anti-CD47 treated mice taken at 10X and (D) 20X. Red box represents field of view for 20X magnification images. Black arrow indicates hemorrhagic lesion within the interstitium.

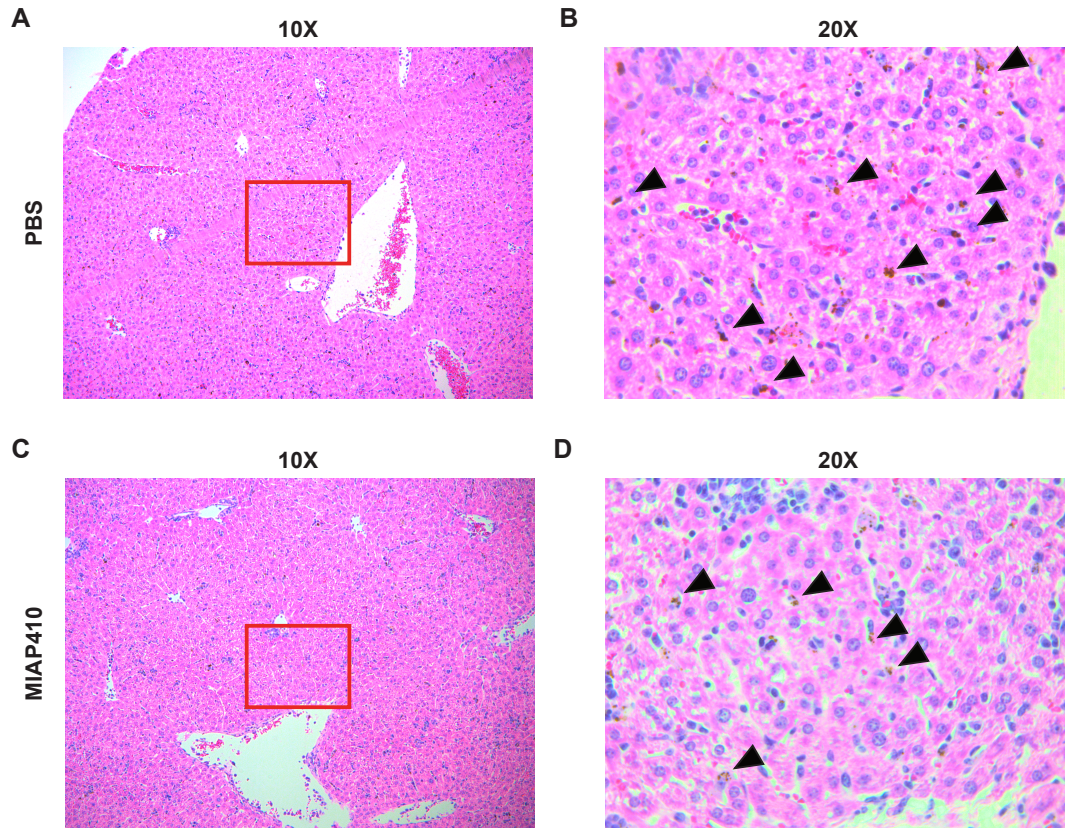

**Figure S5. CD47 blockade reduces pathologic features of experimental cerebral malaria in the liver.** C57BL/6 mice on day 6 post-infection (A) H&E staining of liver tissue of PBS treated mice taken at 10X and (B) 20X, and (C) anti-CD47 treated mice taken at 10X and (D) 20X. Red box represents field of view for 20X magnification images. Black arrows indicate dark-brownish pigmented malaria metabolite, hemozoin.
